# Supplementary material
Source: PubMed Central journal article supplement (PMC4681442)
Supplement: NIHMS741706-supplement-Supporting_Information.pdf [file NIHMS741706-supplement-Supporting_Information.pdf]

## Supporting information

### Contents

#### Materials and reagents

#### Instruments

#### MTT and WST assays

**Scheme S1.** Synthetic route of the precursors

**Scheme S2.** Structure of **3**

**Figure S1.** <sup>1</sup>H NMR and LC-MS spectra of L-1

**Figure S2.** <sup>1</sup>H NMR and LC-MS spectra of D-1

**Figure S3.** <sup>1</sup>H NMR and LC-MS spectra of **3**

**Figure S4.** Cytotoxicity of L-1 and D-1 on SKOV3 cells

**Figure S5.** Rheological measurement of the gels formed by L-1 and D-1

**Figure S6.** TEM images of the solutions of L-1 or D-1 at concentrations from 20 to 100 μM after being treated with CES (2 U/mL)

**Table S1.** Composition and concentrations of the culture medium after being incubated with SKOV3 cells and A2780cis cells

**Figure S7.** The fluorescence images of SKOV3, A2780cis and HS-5 cells stained by 6-CFDA.

**Figure S8.** Cytotoxicity of **3** on SKOV3 cells and A2780cis cells

**Figure S9.** Cell viability of SKOV3 cells and A2780cis cells incubated with **3** alone, or in combination with cisplatin

**Figure S10.** The F-actin staining fluorescence images of SKOV3 cells with or without the treatment of D-1

**Figure S11.** The F-actin staining fluorescence images of SKOV3 cells with the treatment of D-1 at higher concentrations

**Figure S12.** The F-actin staining fluorescence images of SKOV3 cells after treatment of D-1 for 20 h and then replace the medium contains D-1 with fresh medium and incubate for another 20 h

**Figure S13.** The F-actin staining fluorescence images of SKOV3 cells with or without the treatment of L-1

**Figure S14.** The F-actin staining fluorescence images of SKOV3 cells after treatment of L-1 for 20 h and then replace the medium contains L-1 with fresh medium and incubate for another 20 h

**Figure S15.** Cytotoxicity of L-1 and D-1 on HS-5 cells

**Figure S16.** Cell viability of HS-5 cells incubated with cisplatin for 3 days

**Figure S17.** Cytotoxicity of L-1 and D-1 on PC12 cells

**Figure S18.** Body weight curves, thymus index and spleen index of mice after injection of D-1, L-1 or PBS buffer.

**Figure S19.** The amount of actin filaments (longer than 5  $\mu\text{m}$ ) in SKOV3 cells after been treated by cultural medium contains 0  $\mu\text{M}$ , 20  $\mu\text{M}$ , 50  $\mu\text{M}$  and 100  $\mu\text{M}$  of D-1 or 50  $\mu\text{M}$  of L-1

**Figure S20.** The signal intensity ratio of static light scattering (SLS) of the solution of (A) L-1 or (B) D-1

**Figure S21.** Cell viability of SKOV3 cells incubated with the precursors D-1 or L-1 alone, or in combination with CDDP for 72 h.

**Figure S22.** The repeated F-actin staining fluorescence images of SKOV3 cells with or without the treatment of D-1 or L-1

**Figure S23.** Cross-cancer alteration summary for CES from different databases (TCGA etc.) and cancer types

**Figure S24.** Cell viability of HS-5 cells incubated with D-1 alone or in combination with cisplatin (CDDP) for 72 h

**Table S2.** Summary of  $\text{IC}_{50}$  and  $\text{IC}_{90}$  values of the precursors against the ovarian cancer cells for 48 h.

**Table S3.** Summary of  $\text{IC}_{90}$  values of the precursors and NapFF against HeLa cells for 48 h.

## Materials and reagents

All of the solvents and chemical reagents were used as received from the commercial sources without further purification. N, N-diisopropylethylamine (DIPEA), O-benzotriazole-N,N,N',N'-tetramethyluronium-hexafluorophosphate (HBTU), N,N'-diisopropylcarbodiimide (DIC), N-hydroxysuccinimide (NHS), and taurine were purchased from ACROS Organics USA. All other amino acid derivatives were purchased from GL Biochem (Shanghai) Ltd.

## Instruments

LC-MS was performed on a Waters Acquity Ultra Performance LC with Waters MICRO-MASS detector. Products were purified with Waters Delta600 HPLC system, which equipped with an XTerra C18 RP column and an in-line diode array UV detector. Hydrogen nuclear magnetic resonance (NMR) spectra were recorded on a Varian Unity Inova 400 with DMSO as solvent. Transmission electron microscope (TEM) images were taken on Morgagni 268 transmission electron microscope. Confocal images were taken on a Leica TCS SP2 Spectral Confocal Microscope. MTT assay for cell cytotoxicity was test on DTX880 Multimode Detector.

## MTT and WST assays

**MTT assay.** We seeded SKOV3 cells in exponential growth phase in a 96 well plate at a concentration of  $1 \times 10^4$  cell/well with 100  $\mu$ L of McCoy's 5A medium modified supplemented with 10% fetal bovine serum (FBS), 100 U/mL penicillin and 100  $\mu$ g/ml streptomycin. The cells were allowed to attach to the wells for 24 h at 37  $^{\circ}$ C, 5% CO<sub>2</sub>. The culture medium was removed and 100  $\mu$ L culture medium containing compounds (immediately diluted from fresh prepared stock solution of 10 mM) at gradient concentrations (0  $\mu$ M as the control) was placed into each well. McCoy's 5A medium modified was regarded as blank. After culturing at 37  $^{\circ}$ C, 5% CO<sub>2</sub> for 24h, 48h and 72h, 10  $\mu$ L of 5 mg/mL MTT ((3-(4,5-Dimethylthiazol-2-yl)-2,5-diphenyltetrazolium bromide) was added to each well, and the plated cells were incubate in dark place for 4 h. 100  $\mu$ L 10% SDS with 0.01 M HCl was added to each well to stop the reduction reaction and to dissolve the purple formazan. After incubation of the cells at 37  $^{\circ}$ C for overnight, the OD at 595 nm of the solution was measured in a microplate reader.

**WST assay.** Cells in exponential growth phase were seeded in a 96 well plate at a concentration of  $1 \times 10^4$  cell/well. The cells were allowed to attach to the wells for 24 h at 37  $^{\circ}$ C. The culture medium was removed and 100  $\mu$ L culture medium containing compounds (immediately diluted from fresh prepared stock solution of 10 mM) at gradient concentrations (0  $\mu$ M as the control) was placed into each well. After the incubation of 72 hours, 10  $\mu$ L of Cell Proliferation Reagent WST-1 was then added to each well and incubated for 2 hours at 37  $^{\circ}$ C, 5% CO<sub>2</sub>. The plate was shaken thoroughly for 1 min on a shaker to ensure homogeneous distribution of color. Subsequently, absorbance was measured at 450 nm in a microplate reader from which data points were collected.

**Scheme S1.** General synthetic route of the precursor (L-1 as an example).

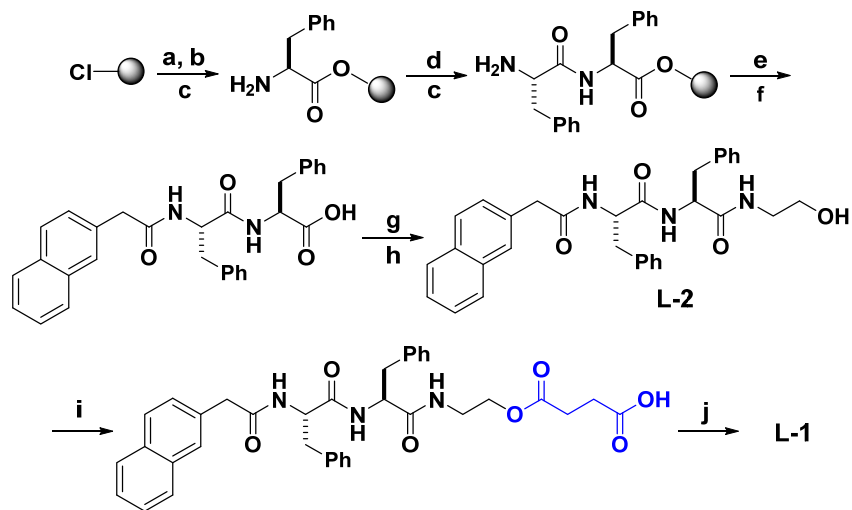

a) Fmoc-L-Phe-(OH), DIEA, DMF, rt, 40 mins; b)  $\text{CH}_2\text{Cl}_2$ : MeOH:DIEA=16:3:1 solution, rt, 10 mins for twice; c) 20% piperidine in DMF, rt, 20 mins; d) Fmoc-L-Phe-(OH), HBTU, DIEA, DMF, rt, 40 mins; e) 2-naphthaleneacetic acid, HBTU, DIEA, DMF, rt, 40 mins; f) 95% TFA in  $\text{H}_2\text{O}$ , rt, 2h; g) NHS, DIC, THF, rt, 3h; h) ethanolamine, DIEA, THF, rt, 1h; i) succinic anhydride, DIEA, DMF, rt, overnight; j) taurine, HBTU, DIEA, DMF, rt, overnight

**Scheme S2.** Structure of the control compound 3.

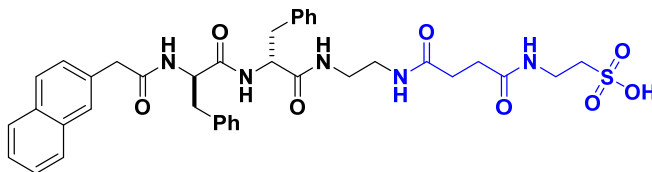

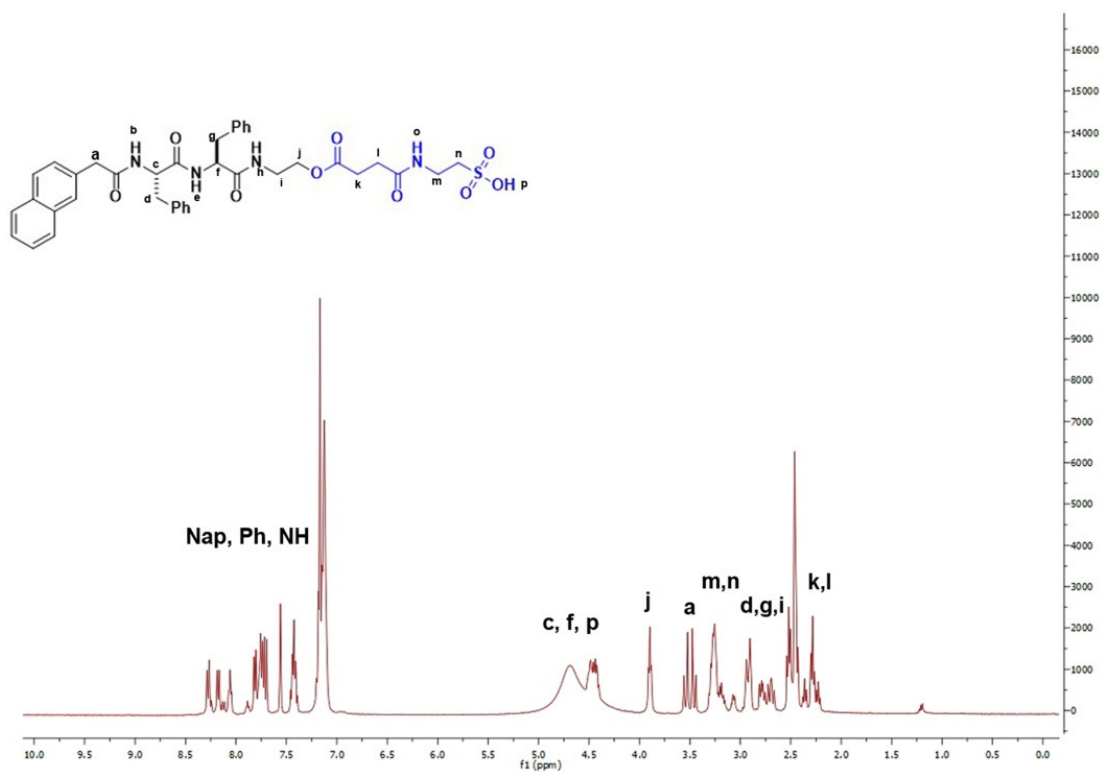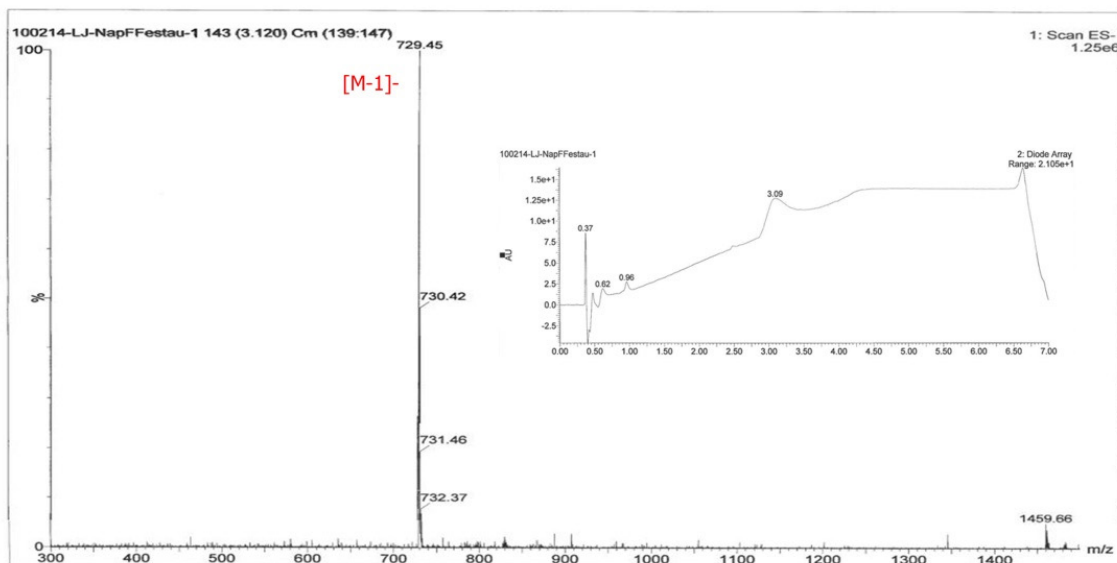

Figure S1. The <sup>1</sup>H NMR spectra of L-1 in DMSO and its LC-MS spectra.

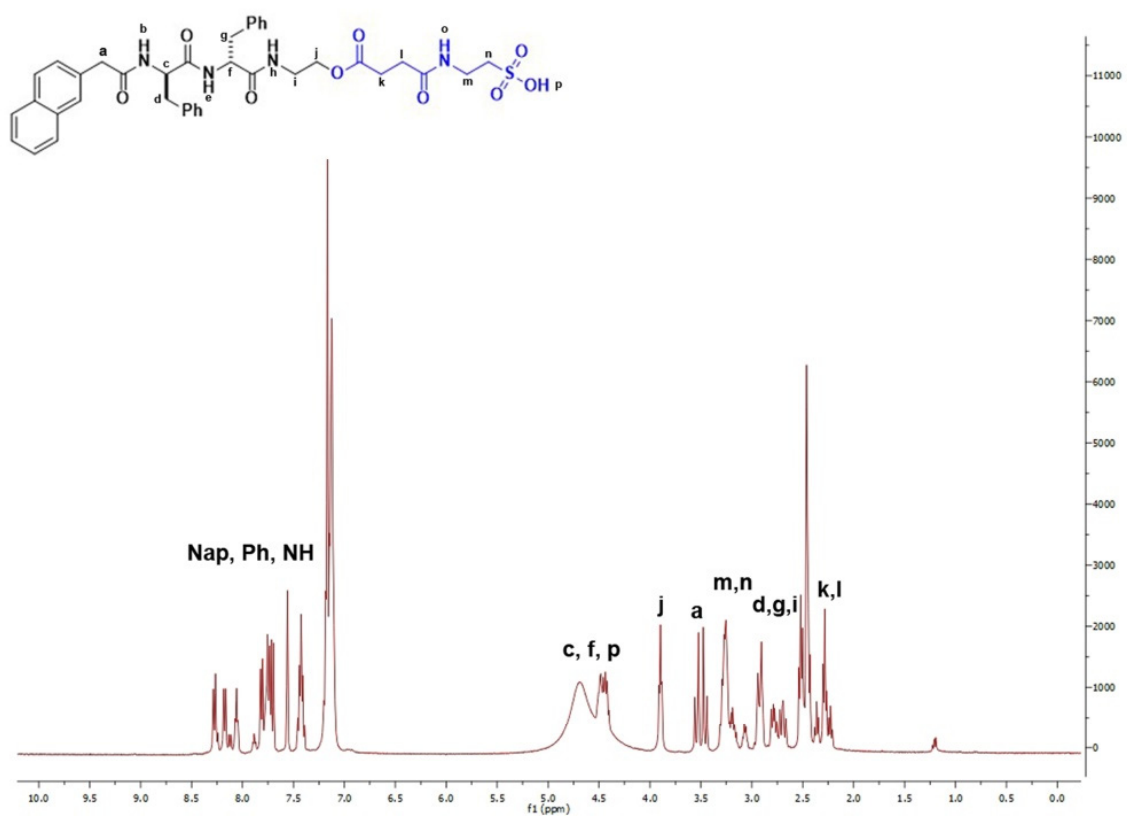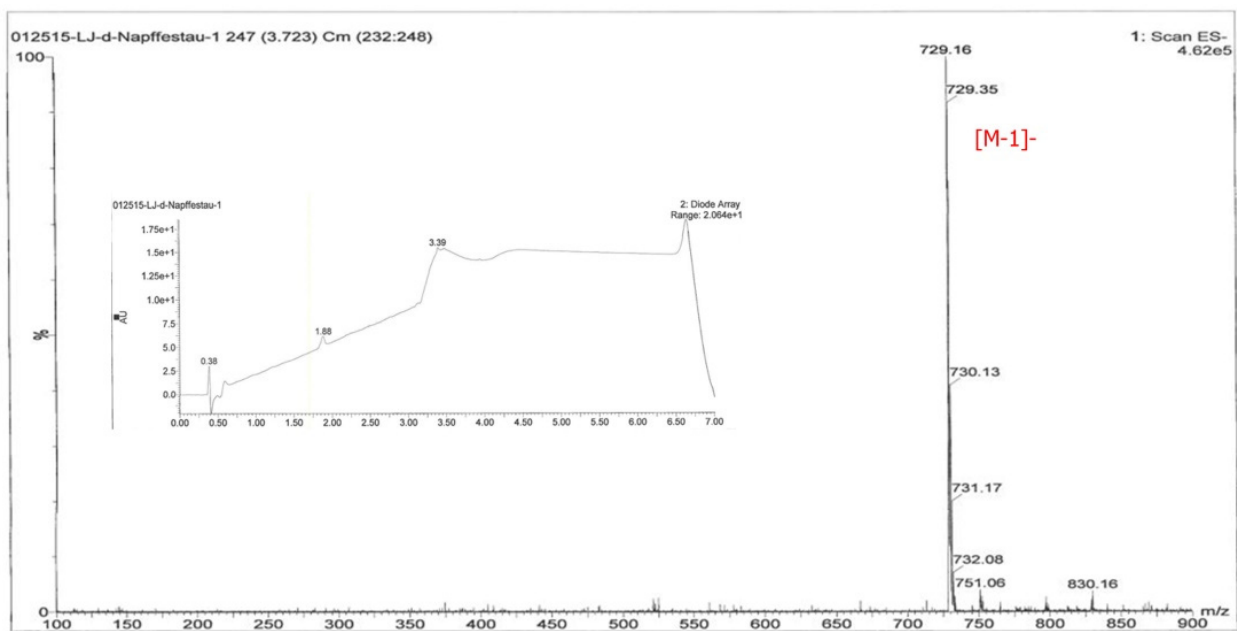

**Figure S2.** The  $^1\text{H}$  NMR spectra of D-1 in DMSO and its LC-MS spectra.

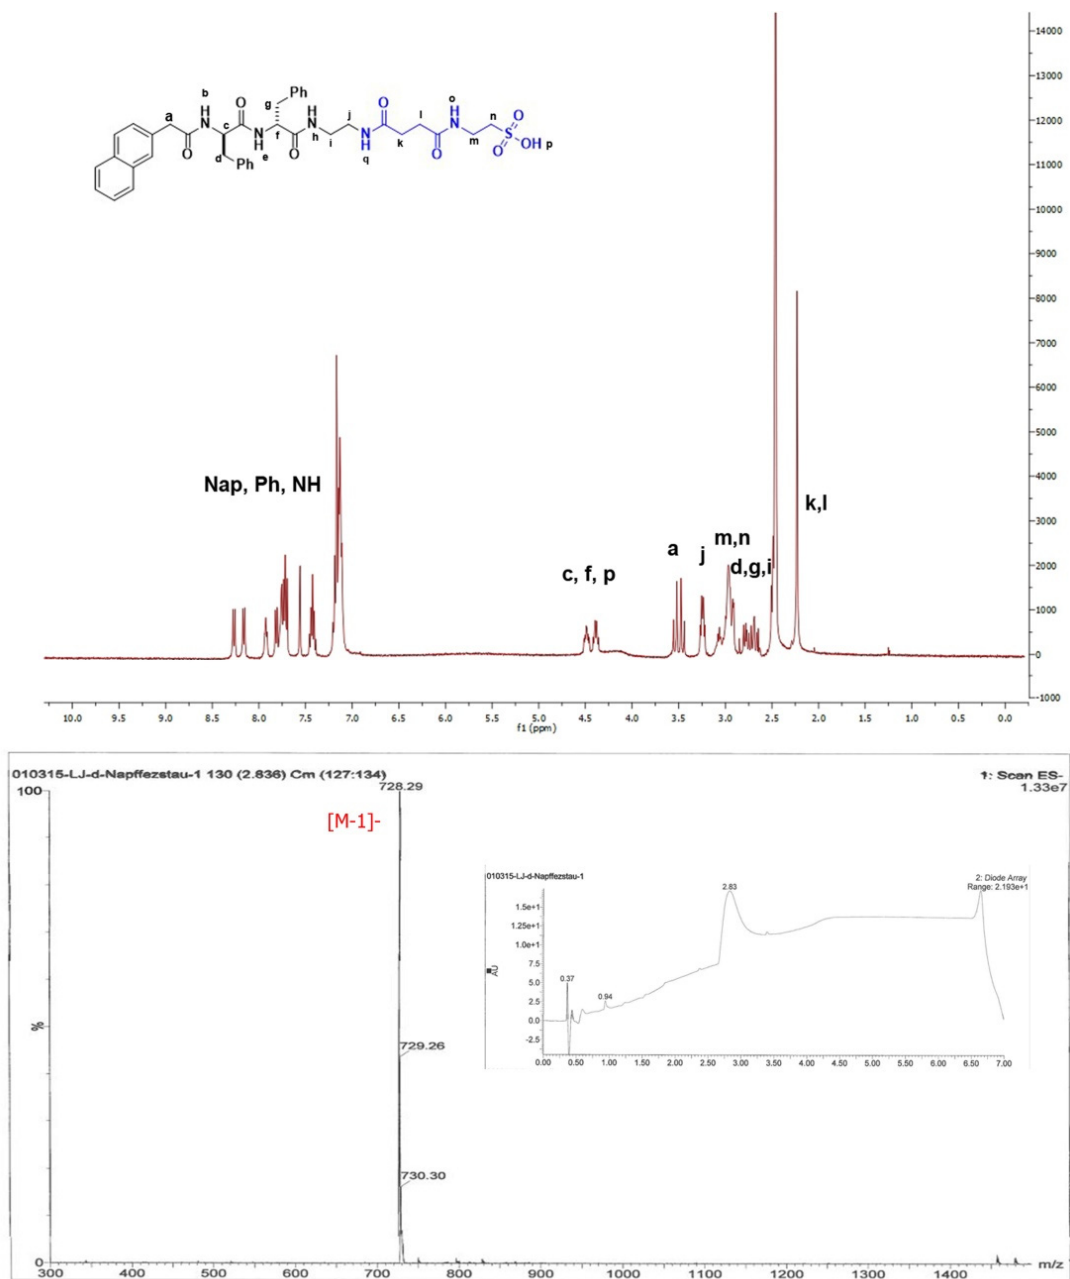

**Figure S3.** The <sup>1</sup>H NMR spectra of **3** in DMSO and its LC-MS spectra.

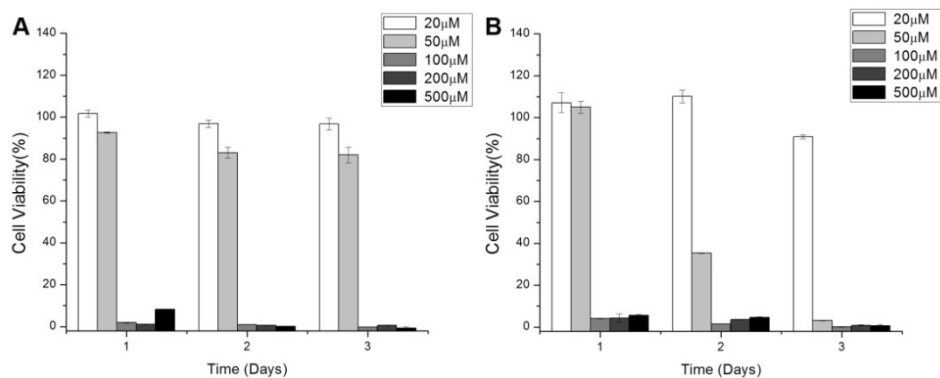

**Figure S4.** Cell viability of SKOV3 cells incubated with the precursors for 3 days. A) Cell viability of SKOV3 cells incubated with L-1. B) Cell viability of SKOV3 cells incubated with D-1.

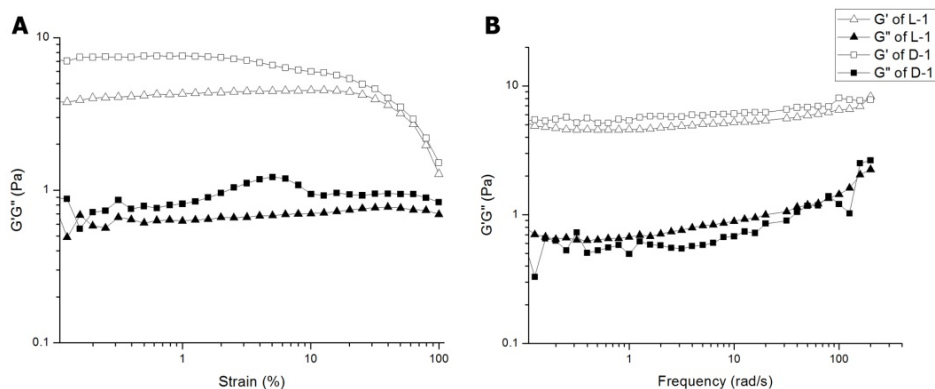

**Figure S5.** The (A) strain and (B) frequency dependence of dynamic storage modulus  $G'$  and loss modulus  $G''$  of the gels formed by L-1 and D-1 at 0.4 wt% upon the treatment of 2 U/mL of CES at pH 7.4 in PBS buffer.



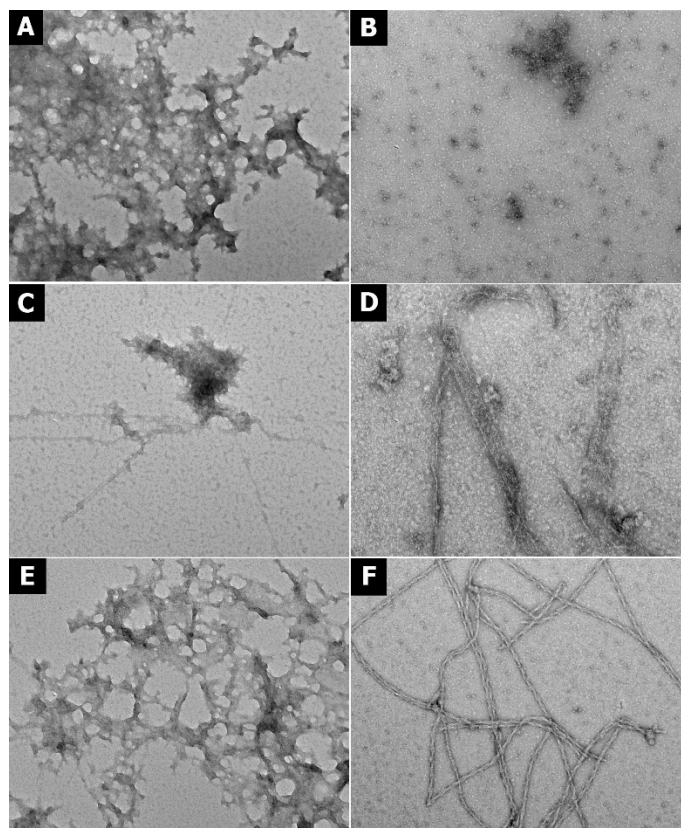

**Figure S6.** TEM images of the solutions of L-1 or D-1 at concentrations from 20 to 100  $\mu\text{M}$  after being treated with CES (2 U/mL). (A) solution of L-1 at concentration of 20  $\mu\text{M}$ , (B) solution of D-1 at concentration of 20  $\mu\text{M}$ , (C) solution of L-1 at concentration of 50  $\mu\text{M}$ , (D) solution of D-1 at concentration of 50  $\mu\text{M}$ , (E) solution of L-1 at concentration of 100  $\mu\text{M}$ , (F) solution of D-1 at concentration of 100  $\mu\text{M}$ , after being treated with CES (Scale bar = 100 nm).

**Table S1.** Composition and concentrations of the culture medium after being incubated with SKOV3 cells and A2780cis cells.

| Compd.           | Precursor (1)<br>( $\mu\text{M}$ ) | Hydrogelator (2)<br>( $\mu\text{M}$ ) | ratio <sup>a</sup> |
|------------------|------------------------------------|---------------------------------------|--------------------|
| L-1 <sup>b</sup> | 39                                 | 9                                     | 0.23               |
| D-1 <sup>b</sup> | 16                                 | 3                                     | 0.18               |
| D-1 <sup>c</sup> | 75                                 | 12                                    | 0.16               |

<sup>a</sup>The ratio of hydrogelator to precursor after 4 h. <sup>b</sup>The culture medium incubated with SKOV3 cells is collected after 4 h incubation with 20  $\mu\text{M}$  (15  $\mu\text{g}/\text{mL}$ ) of D-1 or with 50  $\mu\text{M}$  (37  $\mu\text{g}/\text{mL}$ ) of L-1 at 37  $^{\circ}\text{C}$ . <sup>c</sup>The culture medium incubated with A2780cis cells is collected after 4 h incubation with 100  $\mu\text{M}$  (73  $\mu\text{g}/\text{mL}$ ) of D-1 at 37  $^{\circ}\text{C}$ .

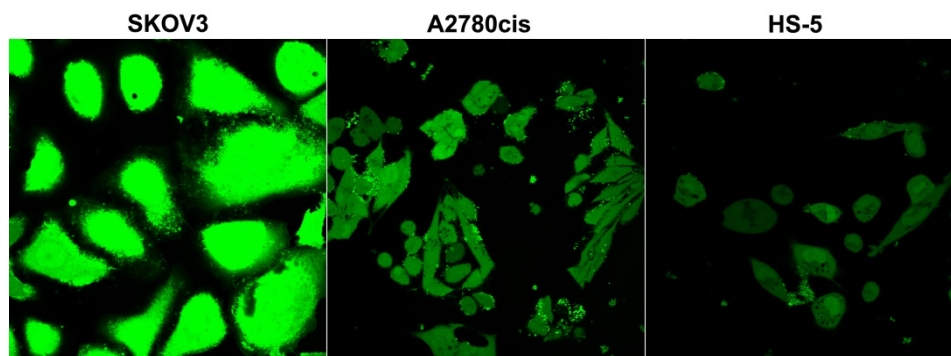

**Figure S7.** The fluorescence images of SKOV3, A2780cis and HS-5 cells stained by 6-CFDA (25  $\mu$ M in PBS buffer) for 20 minutes (PMT = 500 V, Pinhole = 0.000114 m). Scale bar = 20  $\mu$ m.

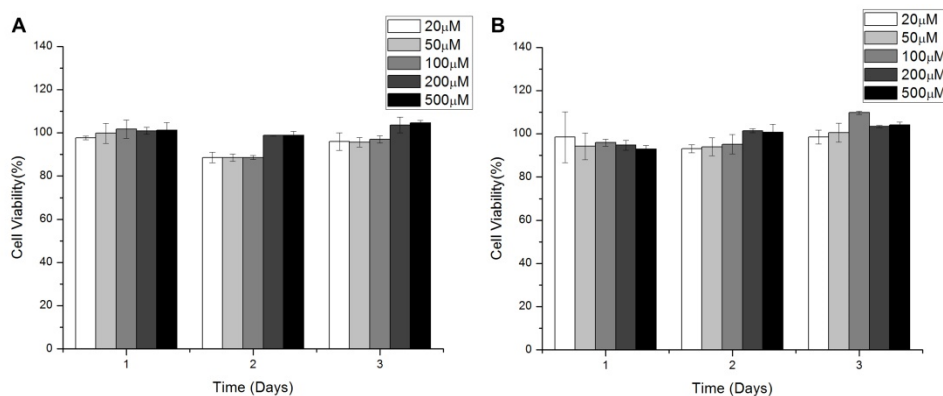

**Figure S8.** (A) Cell viability of SKOV3 cells incubated with the control **3** for 3 days. (B) Cell viability of A2780cis cells incubated with the control **3** for 3 days.

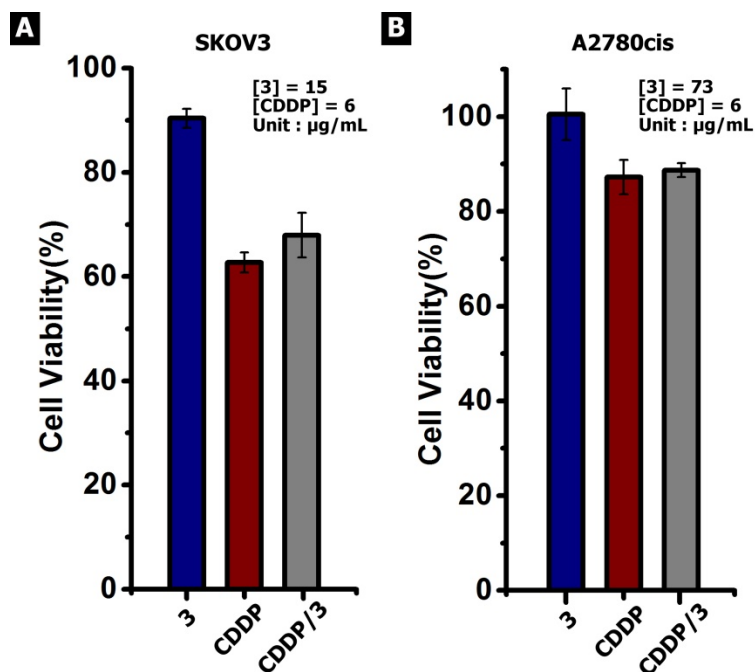

**Figure S9.** (A) Cell viability of SKOV3 cells incubated with the control **3** alone or in combination with cisplatin (CDDP) for 72 h. (B) Cell viability of A2780cis cells incubated with the control **3** alone or in combination with cisplatin (CDDP) for 72 h.

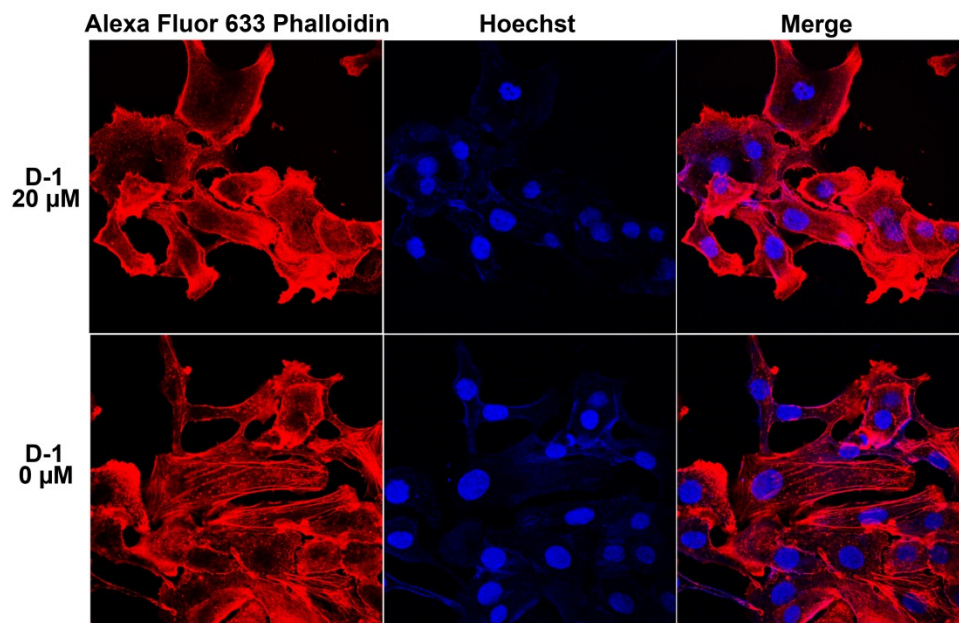

**Figure S10.** The fluorescence images of SKOV3 cells stained with Alexa Fluor 633 Phalloidin (F-actin) and Hoechst (nuclei) (upper) after treatment of D-1 at concentration of 20  $\mu\text{M}$  for 20 h or (bottom) without the treatment of D-1. Scale bar = 20  $\mu\text{m}$ .

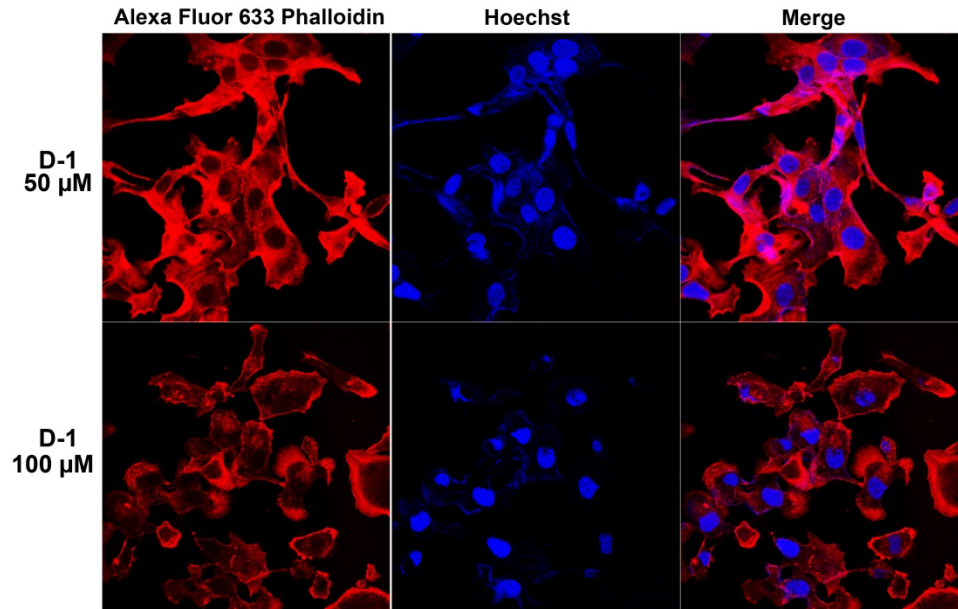

**Figure S11.** The fluorescence images of SKOV3 cells stained with Alexa Fluor 633 Phalloidin (F-actin) and Hoechst (nuclei) (upper) after treatment of D-1 at concentration of 50  $\mu\text{M}$  for 20 h or (bottom) after the treatment of D-1 at concentration of 100  $\mu\text{M}$  for 20 h. Scale bar = 20  $\mu\text{m}$ .

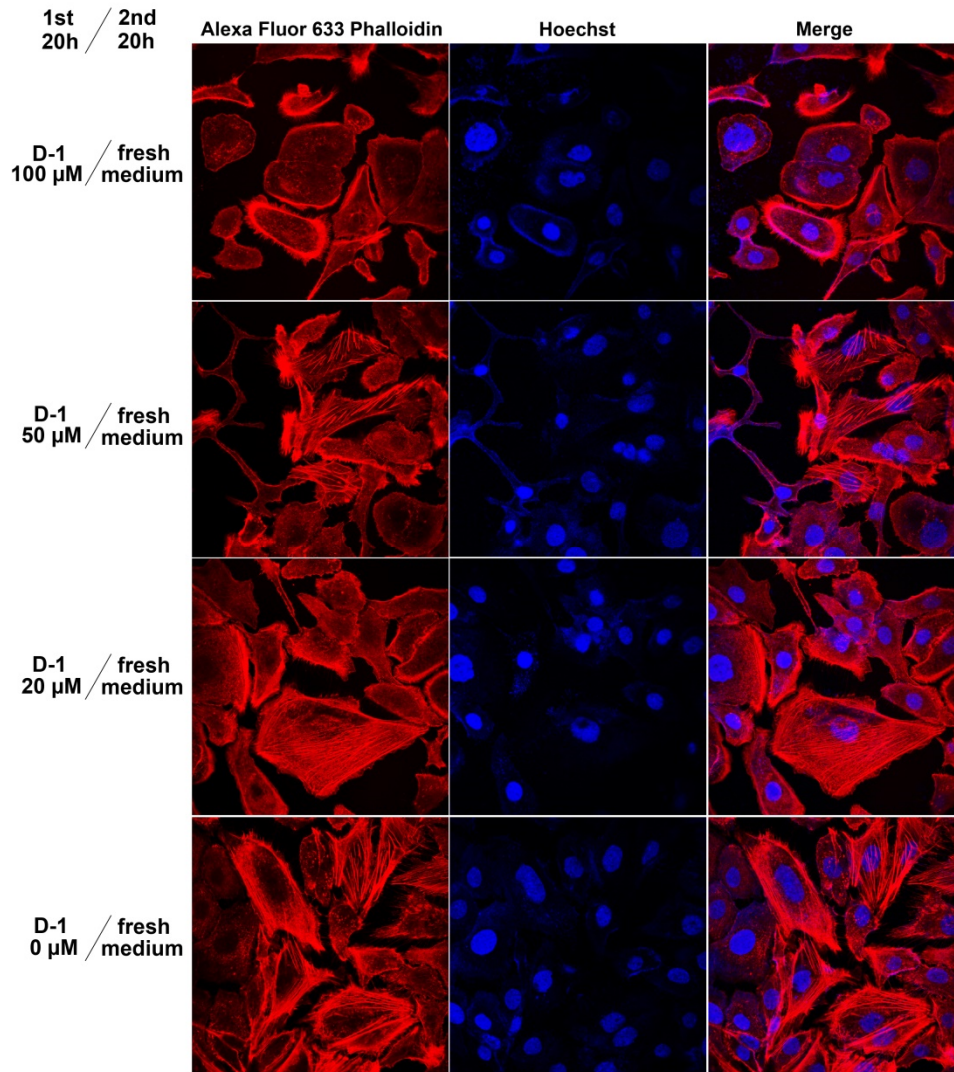

**Figure S12.** The fluorescence images of SKOV3 cells stained with Alexa Fluor 633 Phalloidin (F-actin) and Hoechst (nuclei) after treatment of D-1 at concentrations of 100  $\mu$ M, 50  $\mu$ M, 20  $\mu$ M and 0  $\mu$ M (control) for 20 h and then replace the medium contains D-1 with fresh medium and incubate for another 20 h. Scale bar = 20  $\mu$ m.

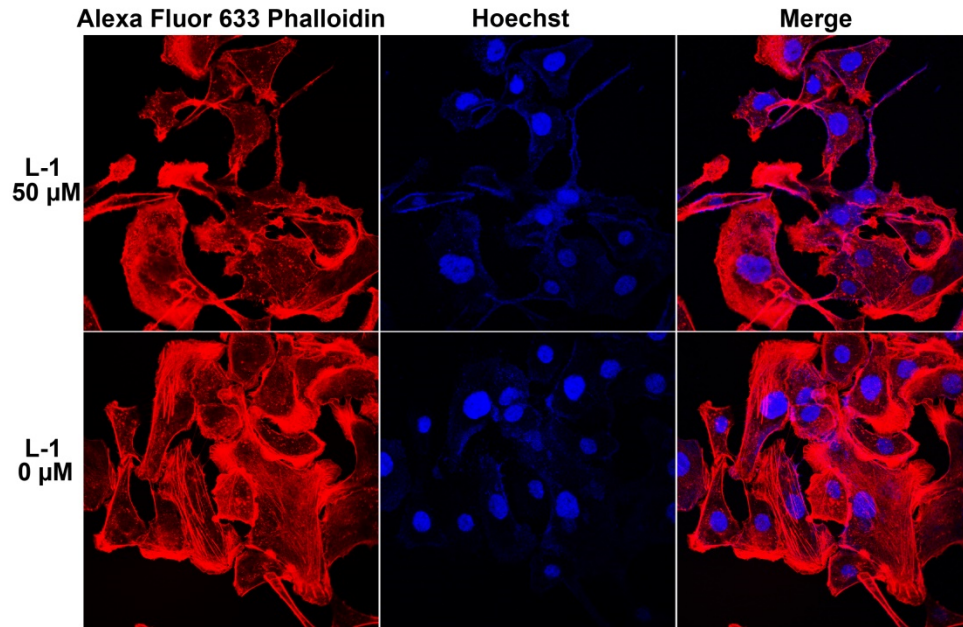

**Figure S13.** The fluorescence images of SKOV3 cells stained with Alexa Fluor 633 Phalloidin (F-actin) and Hoechst (nuclei) (upper) after treatment of L-1 at concentration of 50  $\mu$ M for 20 h or (bottom) without the treatment of L-1. Scale bar = 20  $\mu$ m.

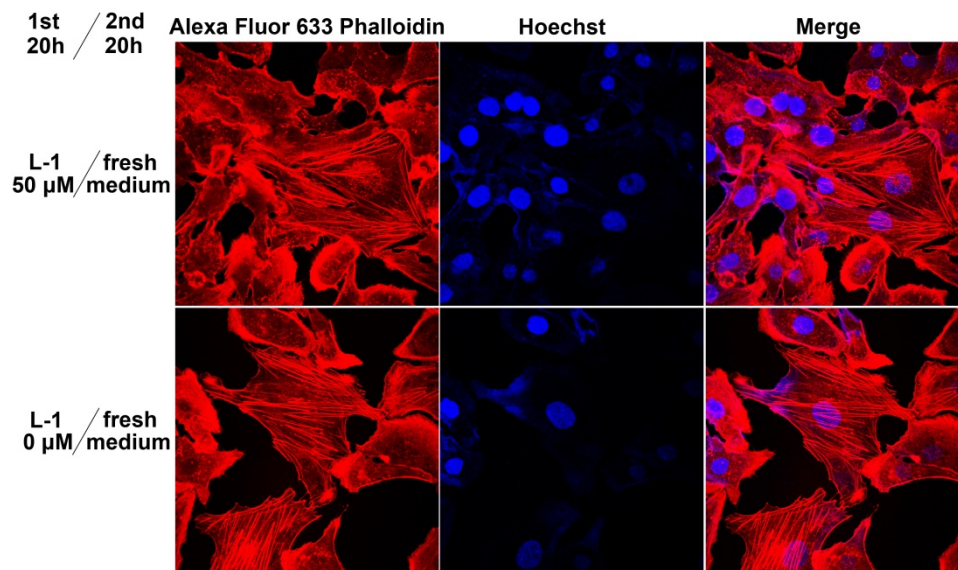

**Figure S14.** The fluorescence images of SKOV3 cells stained with Alexa Fluor 633 Phalloidin (F-actin) and Hoechst (nuclei) after treatment of L-1 at concentrations of 50  $\mu$ M and 0  $\mu$ M (control) for 20 h and then replace the medium contains L-1 with fresh medium and incubate for another 20 h. Scale bar = 20  $\mu$ m.

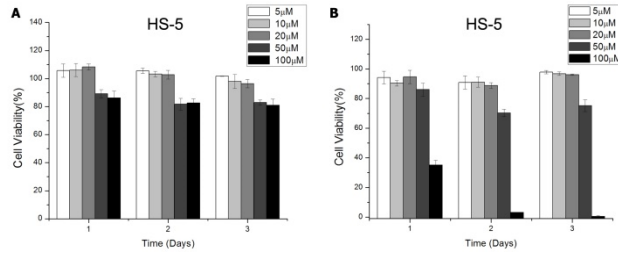

**Figure S15.** Cell viability of HS-5 cells incubated with the precursors for 3 days. A) L-1. B) D-1.

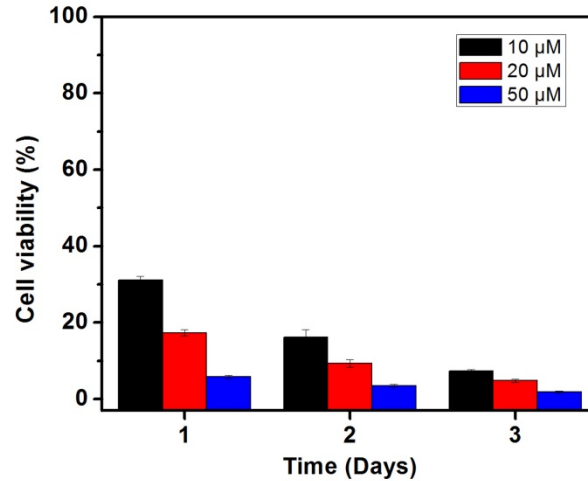

**Figure S16.** Cell viability of HS-5 cells incubated with cisplatin for 3 days.

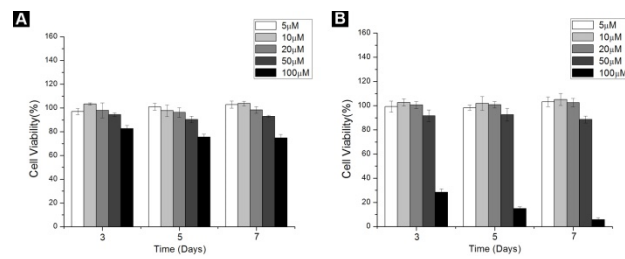

**Figure S17.** Cell viability of PC12 cells incubated with the precursors for 7 days. A) L-1. B) D-1.

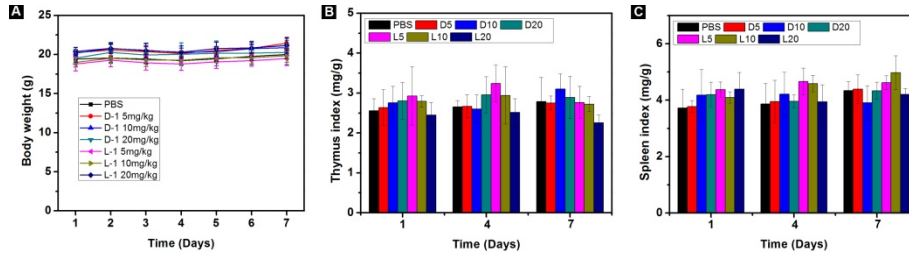

**Figure S18.** (A) Body weight curves of mice after injection of D-1 or L-1 at 5 mg/kg, 10mg/kg and 20 mg/kg or PBS buffer. Data are shown as mean  $\pm$  SD of body weight (n = 4). (B) Thymus index, (C) spleen index of mice after injection of D-1 or L-1 at 5 mg/kg, 10mg/kg and 20 mg/kg or PBS buffer.

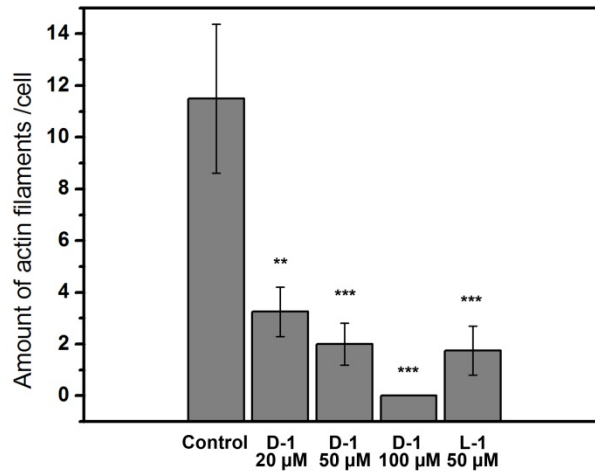

**Figure S19.** The amount of actin filaments (longer than 5  $\mu$ m) in SKOV3 cells after been treated by medium contains 0  $\mu$ M, 20  $\mu$ M, 50  $\mu$ M and 100  $\mu$ M of D-1 or 50  $\mu$ M of L-1 (\*\* =  $p \leq 0.01$ , \*\*\* =  $p \leq 0.001$  versus control).

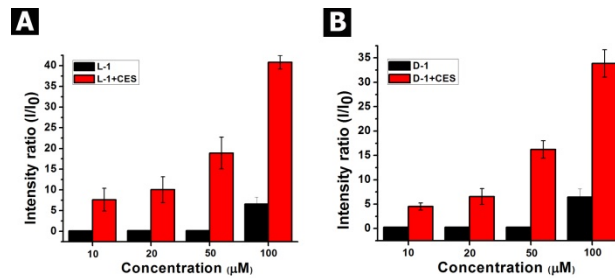



**Figure S20.** A repeated SLS experiment. The signal intensity ratio of static light scattering (SLS) of the solution of (A) L-1 or (B) D-1 at concentrations from 10 to 100  $\mu\text{M}$  before (black bar) and after (red bar) being treated CES (2 U/mL) for three hours.

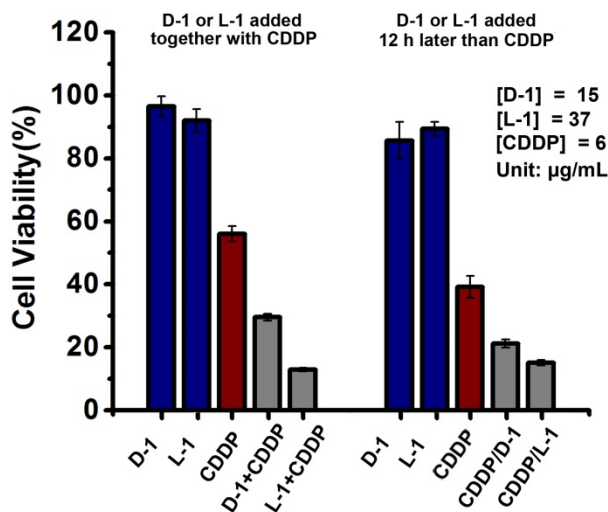

**Figure S21.** A repeated SKOV3 cytotoxicity experiment. Cell viability of SKOV3 cells incubated with the precursors D-1 or L-1 alone, or in combination with CDDP for 72 h.

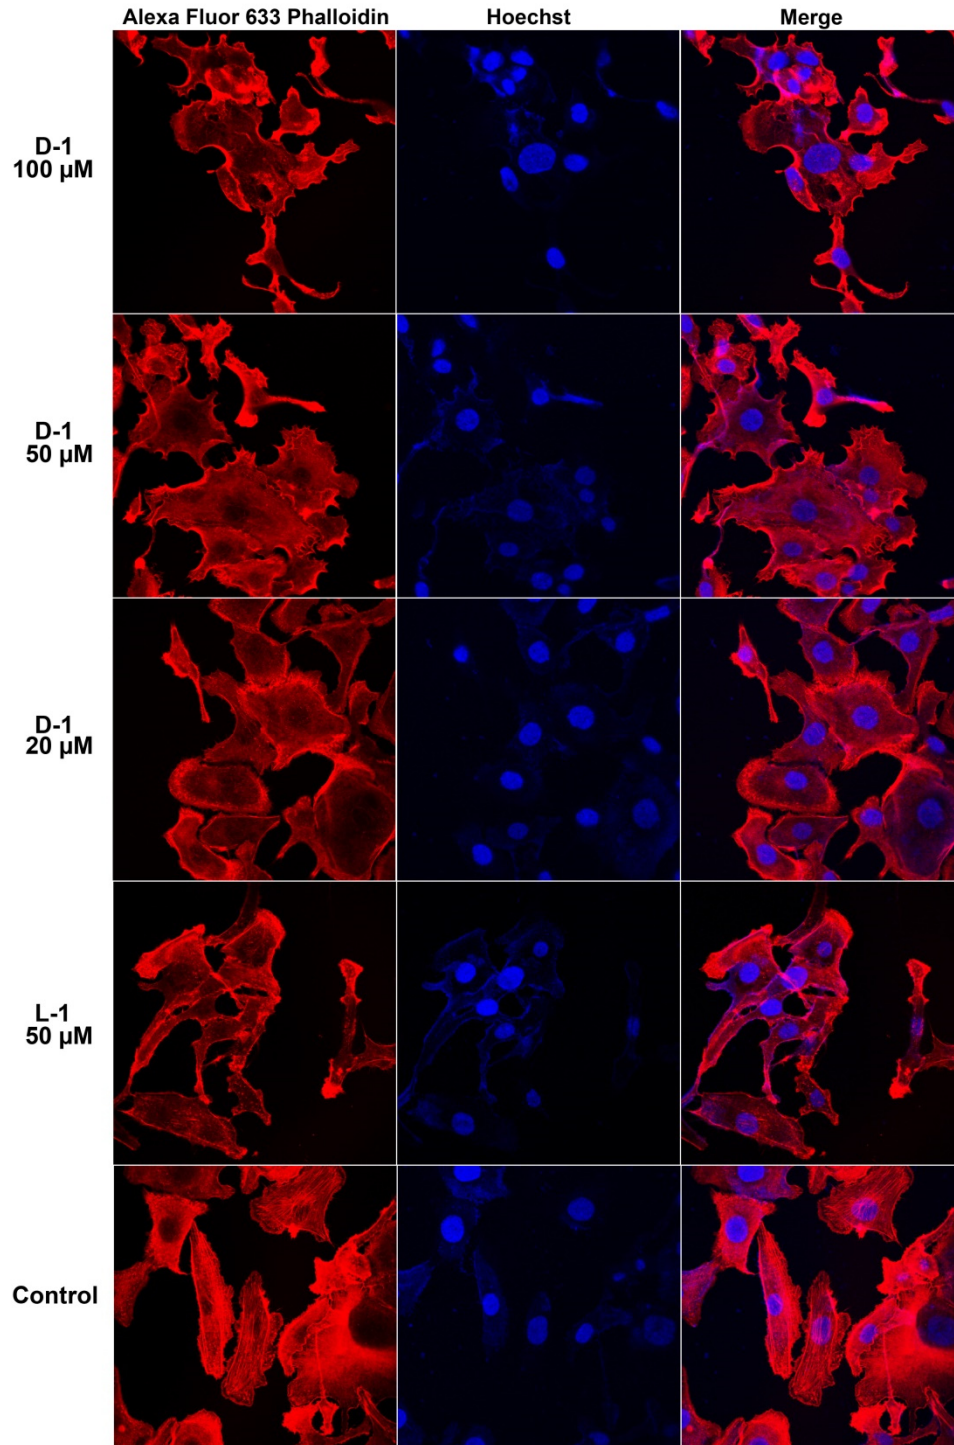

**Figure S22.** Repeated fluorescence images. The fluorescence images of SKOV3 cells stained with Alexa Fluor 633 Phalloidin (F-actin) and Hoechst (nuclei) after treatment of D-1 at concentration of 100  $\mu$ M, 50  $\mu$ M, 20  $\mu$ M and 0  $\mu$ M (control) or L-1 at concentration of 50  $\mu$ M for 20 h. Scale bar = 20  $\mu$ m.

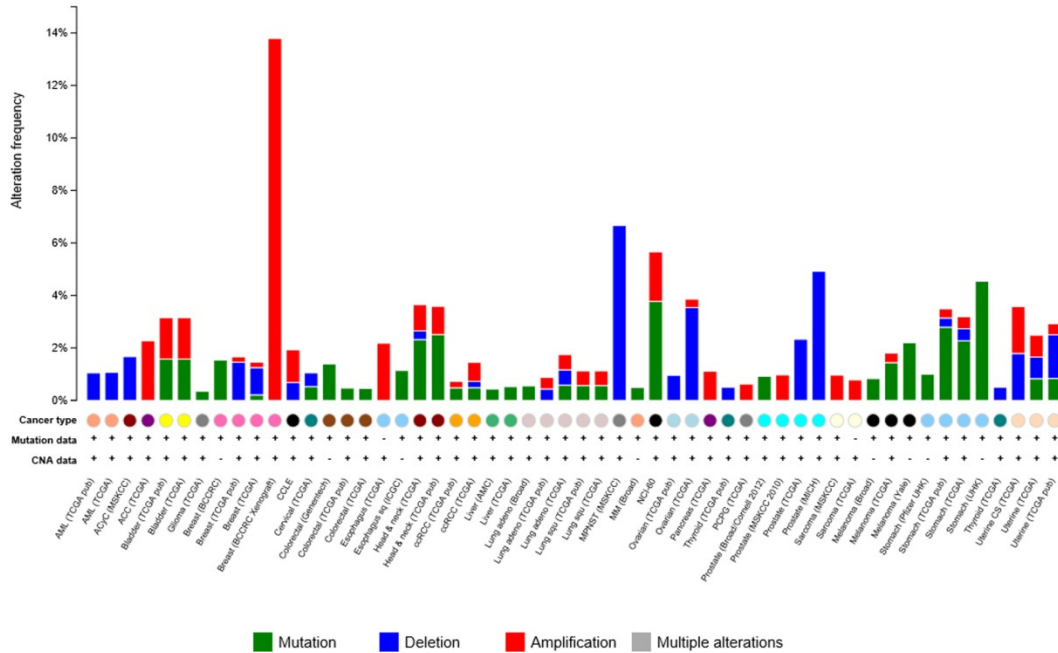

**Figure S23.** Cross-cancer alteration summary for CES from different databases (TCGA etc.) and cancer types: the alteration frequency profile of CES includes mutation (green), deletion (blue), amplification (red) and multiple alterations (grey). From this figure, CES expressions differ dramatically throughout various cancers and organs.

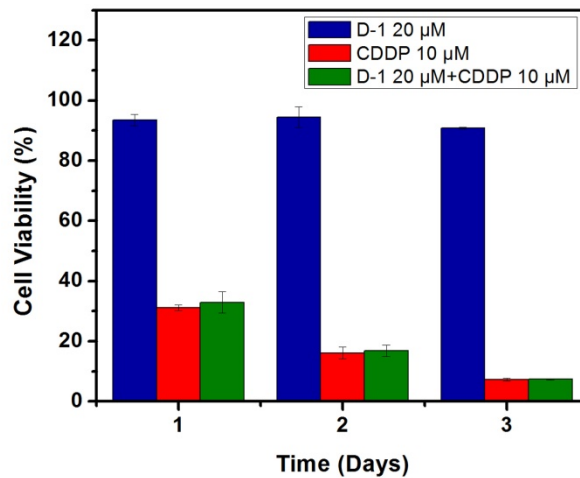

**Figure S24.** Cell viability of HS-5 cells incubated with D-1 alone or in combination with cisplatin (CDDP) for 72 h.

**Table S2.** Summary of IC<sub>50</sub> and IC<sub>90</sub> values of the precursors against the ovarian cancer cells for 48 h.

| Compd. | SKOV3            |                  | A2780cis         |                  |
|--------|------------------|------------------|------------------|------------------|
|        | IC <sub>50</sub> | IC <sub>90</sub> | IC <sub>50</sub> | IC <sub>90</sub> |
| L-1    | 62               | 78               | 94               | 98               |
| D-1    | 48               | 53               | 69               | 73               |

**Table S3.** Summary of IC<sub>90</sub> values of the precursors and NapFF against HeLa cells for 48 h.

| Compd. | IC <sub>90</sub> (μM) |
|--------|-----------------------|
| L-1    | 500                   |
| D-1    | 78                    |
| NapFF  | 400                   |
